# Supplementary material for: On demand rapid patterning of colored amorphous molybdenum oxide using a focused laser beam
Source: Royal Society of Chemistry journal article supplement (doi:10.1039/c6tc04580d), 2017-01-01
Supplement: c6tc04580d1.pdf [file c6tc04580d1.pdf]

## On Demand Rapid Patterning of Colored Amorphous Molybdenum Oxide Painted via a Focused Laser Beam

Lili Gong<sup>a</sup> and Sow Chorng Haur<sup>b</sup>

<sup>a</sup>Department of Physics, National University of Singapore, 2 Science Drive 3, Singapore 117542,

<sup>b</sup>Center for Advanced 2D Materials and Graphene Research Center, National University of Singapore, 6 Science Drive 2, Singapore 117546

Correspondence author: Sow Chorng Haur: [physowch@nus.edu.sg](mailto:physowch@nus.edu.sg)

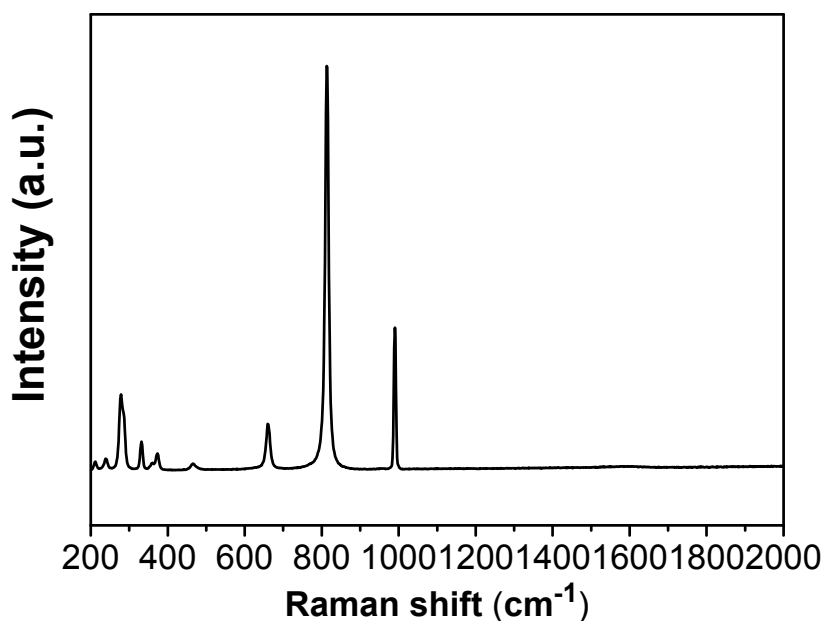

**Figure S1.** Raman spectroscopy for the white powder obtained by annealing CNT-MoS<sub>x</sub> in ambient at 600°C.

After annealing in ambient at 600°C, the black CNT-MoS<sub>x</sub> powder turns white. Raman spectroscopy was employed to investigate the composition of the white product. As shown in Figure S1, sharp peaks located at 219 cm<sup>-1</sup>, 245 cm<sup>-1</sup>, 290 cm<sup>-1</sup>, 337 cm<sup>-1</sup>, 377 cm<sup>-1</sup>, 666 cm<sup>-1</sup>, 819 cm<sup>-1</sup>, 995 cm<sup>-1</sup> clearly confirm the composition of the white powder to be MoO<sub>3</sub>. This result demonstrates the uniqueness of laser scanning process.
